# Supplementary material
Source: publisher figshare collection journal article supplement (https://acs.figshare.com/ndownloader/files/4704772)
Supplement: Supplementary file 1 [file 4704772]

Figure 1S

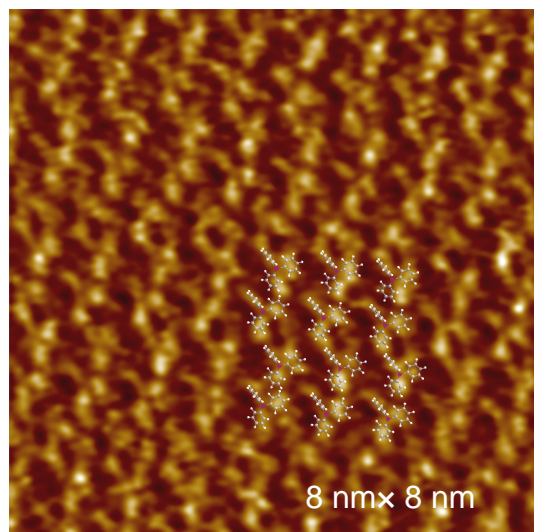

Fig. 1S STM image of SAM of the PPh<sub>3</sub> ligand molecules on Au(111) formed by dipping in an aqueous solution containing only the PPh<sub>3</sub> ligand molecules. The image was recorded in air.

**Table 1S.** XPS Binding Energies for Rh of various states.

| Sample                                                                            | Rh 3d <sub>5/2</sub><br>(eV) | Rh valence | Reference |
|-----------------------------------------------------------------------------------|------------------------------|------------|-----------|
| Rh metal                                                                          | 307.0                        | 0          | 1         |
| Rh film deposited<br>on Au(111) from<br>RhCl <sub>3</sub>                         | 307.8                        | 0          | this work |
| RhCl(CO)(PPh <sub>3</sub> ) <sub>2</sub>                                          | 308.2                        | +1         | 2         |
| Surface-bound<br>RhCl(CO)(PPh <sub>3</sub> ) <sub>2</sub><br>on Au(111)           | 308.4                        | +1         | this work |
| Surface-bound<br>RhCl(CO)(PPh <sub>3</sub> ) <sub>2</sub> on<br>Au(111) after HER | 307.8                        | 0          | this work |

References

- (1) Contour, J. P.; Mouvier, G.; Hoogewys, M.; Leclere, C. *J. Catal.* **1977**, *48*, 217-228.
- (2) Gassman, P. G.; Macomber, D. W.; Willging, S. P. *J. Am. Chem. Soc.* **1985**, *107*, 2380-2388.
